# Supplementary material for: Molecular and Morphological Data Improve the Classification of Plantagineae (Lamiales)
Source: MDPI journal article supplement (doi:10.3390/plants10112299), 2021-10-26
Supplement: s1 [file s1]

# Plantagineae Dumort.\*

Alexey Shipunov, Gustavo Hassemer  
& José Luis Fernández Alonso

2021-06-04

## Genus 1. ARAGOA Kunth

### Sectio Ciliatae Fern.Alonso

- 1(1). *Aragoa lucidula* S.F.Blake

### Sectio Aragoa

- 1(2). *Aragoa abietina* Kunth  
2(3). *Aragoa abscondita* Fern.Alonso  
3(4). *Aragoa castroviejoi* Fern.Alonso  
4(5). *Aragoa cleefii* Fern.Alonso  
5(6). *Aragoa corrugatifolia* Fern.Alonso  
6(7). *Aragoa cundinamarcensis* Fern.Alonso  
7(8). *Aragoa cupressina* Kunth  
8(9). *Aragoa dugandii* Romero  
9(10). *Aragoa funckii* Fern.Alonso  
10(11). *Aragoa hammenii* Fern.Alonso  
11(12). *Aragoa kogiorum* Romero  
12(13). *Aragoa lycopodioides* Benth. ex Oliver  
13(14). *Aragoa occidentalis* Pennell  
14(15). *Aragoa parviflora* Fern.Alonso & Castrov.  
15(16). *Aragoa perez-arbelaeziana* Romero  
16(17). *Aragoa picachensis* Fern.Alonso  
17(18). *Aragoa romeroi* Fern.Alonso  
18(19). *Aragoa tamana* Fern.Alonso  
19(20). *Aragoa* × *chingacensis* Fern.Alonso<sup>1</sup>  
20(21). *Aragoa* × *diazii* Fern.Alonso<sup>2</sup>  
21(22). *Aragoa* × *funzana* Fern.Alonso<sup>3</sup>  
22(23). *Aragoa* × *jaramilloi* Fern.Alonso<sup>4</sup>

---

\*Non-standard abbreviations used: sed.m. *sedis mutabilis*; stat.m. *status mutabilis*.

<sup>1</sup>*Aragoa abietina* × *Aragoa cundinamarcensis*

<sup>2</sup>*Aragoa corrugatifolia* × *Aragoa cundinamarcensis*

<sup>3</sup>*Aragoa cleefii* × *Aragoa cundinamarcensis*

<sup>4</sup>*Aragoa abietina* × *Aragoa cupressina*

Genus 2. LITTORELLA P.J.Bergius

- 1(24). *Littorella americana* Fernald<sup>5</sup>
- 2(25). *Littorella australis* Griseb. ex Benth. & Hook.f.<sup>6</sup>
- 3(26). *Littorella uniflora* (L.) Asch.<sup>7</sup>

Genus 3. PLANTAGO L.

Subgenus *Coronopus* (Lam. & DC.) Rahn

Sectio *Coronopus*

- 1(27). *Plantago asphodeloides* Svent
- 2(28). *Plantago coronopus* L.<sup>8</sup>
- 3(29). *Plantago carnosus* Lam.
- 4(30). *Plantago crassifolia* Forssk.
- 5(31). *Plantago crypsoides* Boiss.<sup>9</sup>
- 6(32). *Plantago macrorrhiza* Poir.
- 7(33). *Plantago serraria* L.<sup>10</sup>
- 8(34). *Plantago subspathulata* Pilg.

Sectio *Maritima* H.Dietr.

- 1(35). *Plantago alpina* L.<sup>11</sup>
- 2(36). *Plantago eocoronopus* Pilg.
- 3(37). *Plantago maritima* L.<sup>12</sup>
- 4(38). *Plantago rhizoxylon* Emb.
- 5(39). *Plantago subulata* L.<sup>13</sup>

Subgenus *Plantago*

Sectio *Micropsyllium* Decne.

- 1(40). *Plantago elongata* Pursh<sup>14</sup>
- 2(41). *Plantago heterophylla* Nutt.<sup>15</sup>
- 3(42). *Plantago oelandica* Shipunov, nom.nov.prop.<sup>16</sup>
- 4(43). *Plantago polysperma* Kar. & Kir.

---

<sup>5</sup>*Plantago americana* (Fernald) Rahn

<sup>6</sup>*Plantago araucana* Rahn

<sup>7</sup>*Plantago uniflora* L.

<sup>8</sup>*Plantago aschersonii* Bolle; *Plantago cupanii* Guss.

<sup>9</sup>*Plantago weldenii* Rehn. sed.m.; *Plantago commutata* Guss. sed.m.; *Plantago sabulosa* Danin & Raus. sed.m.

<sup>10</sup>*Plantago peloritana* Lojac

<sup>11</sup>*Plantago dardanae* Rexhepi & D. Dimitrov; *Plantago penyalarensis* Pau

<sup>12</sup>*Plantago atlantica* Batt.; *Plantago juncoides* Lam.; *Plantago neumannii* Opiz; *Plantago oliganthos* Roem. & Schult.; *Plantago salsa* Pall.; *Plantago schrenkii* C. Koch.; *Plantago serpentina* All.; *Plantago strictissima* L.; *Plantago subpolaris* Andr.

<sup>13</sup>*Plantago algarbiensis* Samp., stat.m.; *Plantago almogravensis* Franco; *Plantago carinata* Schrad. ex Mert. & W.D.J.Koch; *Plantago holosteum* Scop.; *Plantago insularis* (Godr.) Nyman; *Plantago radicata* Hoffmans. & Link

<sup>14</sup>*Plantago bigelovii* A. Gray

<sup>15</sup>*Plantago hybrida* Bart.

<sup>16</sup>*Plantago minor* Fr., nom.illeg., non *Plantago minor* Gilib.

- 5(44). *Plantago pusilla* Nutt.  
6(45). *Plantago tenuiflora* Waldst. & Kit.

**Sectio Eremopsyllium** Pilg.

- 1(46). *Plantago gentianoides* Sibth. & Sm.  
2(47). *Plantago reniformis* Beck

**Sectio Lamprosanthia** Decne.

- 1(48). *Plantago arachnoidea* Schrenk ex Fisch. & C.A.Mey.  
2(49). *Plantago canescens* Adams<sup>17</sup>  
3(50). *Plantago krascheninnikovii* Ye. V. Serg.  
4(51). *Plantago maxima* Juss. ex Jacq.  
5(52). *Plantago media* L.<sup>18</sup>  
6(53). *Plantago perssonii* Pilg.  
7(54). *Plantago schwarzenbergiana* Schur

**Sectio Leptostachys** Decne.

- 1(55). *Plantago africana* Verdc.  
2(56). *Plantago fischeri* Engl.  
3(57). *Plantago laxiflora* Decne.  
4(58). *Plantago longissima* Decne.<sup>19</sup>  
5(59). *Plantago palmata* Hook.f.  
6(60). *Plantago remota* Lam.<sup>20</sup>  
7(61). *Plantago tanalensis* Baker

**Sectio Mesembrynia** Decne.

- 1(62). *Plantago alpestris* B.G.Briggs & al.  
2(63). *Plantago antarctica* Decne.  
3(64). *Plantago aucklandica* Hook.f.  
4(65). *Plantago aundensis* P. Royen  
5(66). *Plantago bellidioides* Decne.  
6(67). *Plantago cladarophylla* B.G.Briggs & al.  
7(68). *Plantago cunninghamii* Decne.<sup>21</sup>  
8(69). *Plantago daltonii* Decne.  
9(70). *Plantago debilis* R.Br.  
10(71). *Plantago depauperata* Merr. & Perry  
11(72). *Plantago drummondii* Decne.<sup>22</sup>  
12(73). *Plantago euana* Hurlim.  
13(74). *Plantago euryphylla* B.G.Briggs & al.  
14(75). *Plantago exilis* Decne.  
15(76). *Plantago gaudichaudii* Barnéoud<sup>23</sup>

---

<sup>17</sup>*Plantago jurtzevii* Tzvel.

<sup>18</sup>*Plantago urvillei* Opiz, stat.m.; *Plantago brutia* Ten.

<sup>19</sup>*Plantago zeyheri* auct., nom.nud.

<sup>20</sup>*Plantago capensis* Bojer

<sup>21</sup>*Plantago mitchellii* Decne.

<sup>22</sup>*Plantago pritzelii* Pilg.

<sup>23</sup>*Plantago sericophylla* Decne.; *Plantago bakeri* Pilg.

- 16(77). *Plantago glabrata* Hook.f.
- 17(78). *Plantago glacialis* B.G.Briggs & al.
- 18(79). *Plantago gunnii* Hook.f.
- 19(80). *Plantago hedleyi* Maiden
- 20(81). *Plantago hispida* R.Br.<sup>24</sup>
- 21(82). *Plantago lanigera* Hook.f.
- 22(83). *Plantago montisdicksonii* P. Royen
- 23(84). *Plantago muelleri* Pilg.
- 24(85). *Plantago multiscapa* B.G.Briggs
- 25(86). *Plantago novae-zelandiae* L.B. Moore
- 26(87). *Plantago obconica* Sykes
- 27(88). *Plantago palustris* L.R.Fraser & Vickery
- 28(89). *Plantago papuana* P. Royen
- 29(90). *Plantago paradoxa* Hook.f.
- 30(91). *Plantago pentasperma* Hemsl.
- 31(92). *Plantago picta* Colenso
- 32(93). *Plantago polita* Craven
- 33(94). *Plantago raoulii* Decne.
- 34(95). *Plantago robusta* Roxb., sed.m.
- 35(96). *Plantago spathulata* Hook.f.
- 36(97). *Plantago stauntonii* Reichardt
- 37(98). *Plantago stenophylla* Merr. & L.M.Perry
- 38(99). *Plantago tasmanica* Hook.f.
- 39(100). *Plantago triandra* Berggr.<sup>25</sup>
- 40(101). *Plantago triantha* Spreng.
- 41(102). *Plantago trichophora* Merr. & L.M.Perry
- 42(103). *Plantago turrifera* B.G.Briggs & al.
- 43(104). *Plantago udicola* Meudt & Garn.-Jones
- 44(105). *Plantago unibracteata* Rahn<sup>26</sup>
- 45(106). *Plantago varia* R.Br.<sup>27</sup>

### Sectio *Plantago*

- 1(107). *Plantago cornuti* Gouan<sup>28</sup>
- 2(108). *Plantago griffithii* Decne.<sup>29</sup>
- 3(109). *Plantago major* L.<sup>30</sup>
- 4(110). *Plantago japonica* Franch. & Sav., stat.m.<sup>31</sup>
- 5(111). *Plantago tatarica* Decne.

---

<sup>24</sup>*Plantago tildeniae* Pilg.

<sup>25</sup>*Plantago masoniae* Cheesem.

<sup>26</sup>*Plantago uniflora* Hook.f., non L.

<sup>27</sup>*Plantago acutiloba* Pilg.; *Plantago struthionis* A.Cunn. ex Decne.

<sup>28</sup>*Plantago exaltata* Hornem.

<sup>29</sup>*Plantago aitchisonii* Pilg.

<sup>30</sup>*Plantago himalaica* Pilg., stat.m.; *Plantago brachyphylla* Edgew. ex Decne.; *Plantago uliginosa* F. W. Schmidt, stat.m.; *Plantago winteri* Wirtg.

<sup>31</sup>*Plantago macronipponica* Yamamoto

**Sectio Heptaneuron** Decne.

- 1(112). *Plantago cordata* Lam.

**Sectio Carpophorae** Rahn

- 1(113). *Plantago rigida* Kunth  
2(114). *Plantago tubulosa* Decne.

**Sectio Pacifica** Hassemer

- 1(115). *Plantago anatolica* Tutel & R.R.Mill  
2(116). *Plantago asiatica* L.<sup>32</sup>  
3(117). *Plantago camtschatica* Link  
4(118). *Plantago chihuahuensis* Shipunov sp.nov.  
5(119). *Plantago depressa* Willd.  
6(120). *Plantago eriopoda* Torr.<sup>33</sup>  
7(121). *Plantago hakusanensis* Koidz.  
8(122). *Plantago hasskarlii* Decne.  
9(123). *Plantago hawaiiensis* (A. Gray) Pilg.  
10(124). *Plantago incisa* Hassk.<sup>34</sup>  
11(125). *Plantago komarovii* Pavlov  
12(126). *Plantago pachyphylla* A. Gray<sup>35</sup>  
13(127). *Plantago princeps* Cham. & Schltdl.<sup>36</sup>  
14(128). *Plantago rapensis* Pilg.  
15(129). *Plantago rugelii* Decne.  
16(130). *Plantago rupicola* Pilg.  
17(131). *Plantago sparsiflora* Michx.  
18(132). *Plantago tweedyi* A. Gray

**Sectio Holopsyllium** Pilg.

- 1(133). *Plantago macrocarpa* Cham. & Schltdl.

**Sectio Virginica** Decne. & Steinh. ex Barnéoud

- 1(134). *Plantago alismatifolia* Pilg.  
2(135). *Plantago argentina* Pilg.  
3(136). *Plantago australis* Lam.<sup>37</sup>  
4(137). *Plantago barbata* G. Forst<sup>38</sup>

---

<sup>32</sup>*Plantago alata* Nakai; *Plantago cavaleriei* H.Lév.; *Plantago centralis* Pilg.; *Plantago coreana* H.Lév.; *Plantago erosa* Wall.; *Plantago fengdouensis* (Z.E Chao & Yong Wang) Yong Wang & Z.Yu Li, stat.m.; *Plantago formosana* Tateishi & Masam.; *Plantago hostifolia* Nakai & Kitag.; *Plantago multistachya* S.H.Oh; *Plantago nanchuanensis* J.Z. Liu, nom.nud.; *Plantago popovii* Tzvel.; *Plantago sawadai* Yamam.; *Plantago schneideri* Pilg.; *Plantago taquetii* H.Lév.; *Plantago yakushimensis* Masam.; *Plantago yezoensis* Pilg.; *Plantago zhongdainensis* J.Z.Liu, sed.m., nom.nud.

<sup>33</sup>*Plantago shastensis* Greene

<sup>34</sup>*Plantago densiflora* J.Z. Liu, sed.m.

<sup>35</sup>*Plantago muscicola* Pilg.; *Plantago hillebrandii* Pilg.; *Plantago glabrifolia* (Rock) Pilg.; *Plantago melanochrous* Pilg.; *Plantago krajinae* Pilg.; *Plantago grayana* Pilg.

<sup>36</sup>*Plantago longibracteata* (Mann) Tessene, nom.nud.

<sup>37</sup>*Plantago candollei* Raf.; *Plantago deppeana* Vatke, sed.m.; *Plantago hirtella* Kunth; *Plantago schiedeana* Decne.

<sup>38</sup>*Plantago monanthos* D'Urville, p.p.

- 5(138). *Plantago berroi* Pilg.
- 6(139). *Plantago bradei* Pilg.
- 7(140). *Plantago buchtienii* Pilg.
- 8(141). *Plantago catharinaea* Decne.
- 9(142). *Plantago commersoniana* Decne. & Barnéoud
- 10(143). *Plantago correae* Rahn
- 11(144). *Plantago corvensis* Hassemer<sup>39</sup>
- 12(145). *Plantago cumingiana* Fisch. & C.A.Mey.
- 13(146). *Plantago cuzcoensis* Shipunov, sp.nov.
- 14(147). *Plantago dielsiana* Pilg.
- 15(148). *Plantago fernandezia* Barnéoud
- 16(149). *Plantago firma* Kunze ex Walp.<sup>40</sup>
- 17(150). *Plantago floccosa* Decne.
- 18(151). *Plantago galapagensis* Rahn
- 19(152). *Plantago guilleminiana* Decne.
- 20(153). *Plantago hatschbachiana* Hassemer
- 21(154). *Plantago humboldtiana* Hassemer
- 22(155). *Plantago jujuyensis* Rahn
- 23(156). *Plantago moorei* Rahn
- 24(157). *Plantago myosuros* Lam.
- 25(158). *Plantago napiformis* (Rahn) Hassemer
- 26(159). *Plantago orbignyana* Decne.<sup>41</sup>
- 27(160). *Plantago oreades* Decne.
- 28(161). *Plantago pachyneura* Steud.
- 29(162). *Plantago penantha* Griseb.
- 30(163). *Plantago pretoana* (Rahn) Hassemer
- 31(164). *Plantago pulvinata* Speg.
- 32(165). *Plantago pyrophila* Villarroel & J. R. I. Wood
- 33(166). *Plantago rahniana* Hassemer & R. Trevis.
- 34(167). *Plantago rhodosperma* Decne.
- 35(168). *Plantago sempervivoides* Dusen
- 36(169). *Plantago subnuda* Pilg., stat.m.
- 37(170). *Plantago tehuelcha* Speg.
- 38(171). *Plantago tenuipala* (Rahn) Rahn
- 39(172). *Plantago tomentosa* Lam.<sup>42</sup>
- 40(173). *Plantago trinitatis* Rahn
- 41(174). *Plantago truncata* Cham. & Schtdl.
- 42(175). *Plantago turficola* Rahn
- 43(176). *Plantago uniglumis* Wallr. ex Walp.<sup>43</sup>
- 44(177). *Plantago veadeirensis* Hassemer

---

<sup>39</sup>*Plantago aparadensis* D. Falkenberg

<sup>40</sup>*Plantago skottsbergii* Pilg.

<sup>41</sup>*Plantago hartwegii* Decne.

<sup>42</sup>*Plantago paralias* Decne.

<sup>43</sup>*Plantago monanthos* D'Urville, p.p.

- 45(178). *Plantago ventanensis* Pilg.  
 46(179). *Plantago venturii* Pilg.  
 47(180). *Plantago virginica* L.  
 48(181). *Plantago weddelliana* Decne.

**Subgenus *Bougueria*** (Decne.) Rahn

- 49(182). *Plantago nubicola* (Decne.) Rahn

**Subgenus *Albicans*** Rahn

**Section *Hymenopsyllium*** Pilg.

- 1(183). *Plantago bellardii* All.<sup>44</sup>  
 2(184). *Plantago benisnassenii* Romo & al.  
 3(185). *Plantago ciliata* Desf.  
 4(186). *Plantago cretica* L.  
 5(187). *Plantago cyrenaica* E.A.Durand & Barratte

**Section *Montana*** Barnéoud

- 1(188). *Plantago atrata* Hoppe<sup>45</sup>  
 2(189). *Plantago cafra* Decne.<sup>46</sup>  
 3(190). *Plantago monosperma* Pourr.  
 4(191). *Plantago nivalis* Boiss.

**Section *Lancifolia*** Barnéoud

- 1(192). *Plantago altissima* L.  
 2(193). *Plantago argentea* Chaix<sup>47</sup>  
 3(194). *Plantago pilgeriana* Hassemer<sup>48</sup>  
 4(195). *Plantago lagopus* L.<sup>49</sup>  
 5(196). *Plantago lanceolata* L.<sup>50</sup>  
 6(197). *Plantago malato-belizii* Lawalree  
 7(198). *Plantago loeflingii* L.<sup>51</sup>

**Section *Albicans*** Barnéoud

- 1(199). *Plantago akkensis* Coss.  
 2(200). *Plantago albicans* L.  
 3(201). *Plantago amplexicaulis* Cav.<sup>52</sup>  
 4(202). *Plantago annua* Ryding  
 5(203). *Plantago baltistanica* Hartmann  
 6(204). *Plantago boissieri* Hausskn. & Bornm.  
 7(205). *Plantago cylindrica* Forssk.

---

<sup>44</sup>*Plantago bellardi* L.

<sup>45</sup>*Plantago discolor* Gand.; *Plantago fuscescens* Jord.; *Plantago saxatilis* Bieb.

<sup>46</sup>*Plantago libyca* Beg. & Vacc.; *Plantago capillaris* E. Mey. ex Decne.

<sup>47</sup>*Plantago serpentinicola* Reich.

<sup>48</sup>*Plantago lacustris* Maire, nom.illeg.; *Plantago maireana* Hassemer

<sup>49</sup>*Plantago lusitanica* L.

<sup>50</sup>*Plantago dubia* L.; *Plantago leiopetala* Lowe *Plantago podlechii* Akhani

<sup>51</sup>*Plantago scabrifolia* Thieb., sed.m.

<sup>52</sup>*Plantago bauphula* Edgew.

- 8(206). *Plantago lachnantha* Bunge<sup>53</sup>
- 9(207). *Plantago lagocephala* Bunge
- 10(208). *Plantago minuta* Pall.<sup>54</sup>
- 11(209). *Plantago notata* Lag.
- 12(210). *Plantago orzuiensis* Mohsenz. & al.
- 13(211). *Plantago ovata* Forssk.<sup>55</sup>
- 14(212). *Plantago psammophila* Agnew & Chal.-Kabi
- 15(213). *Plantago sharifii* Rech.f. & Esfand., sed.m.
- 16(214). *Plantago stocksii* Boiss.
- 17(215). *Plantago tunetana* Murb.

### **Sectio Gnaphaloides Barnéoud**

- 1(216). *Plantago argyrea* Morris
- 2(217). *Plantago aristata* Michx.
- 3(218). *Plantago bismarckii* Niederl.
- 4(219). *Plantago brasiliensis* Sims
- 5(220). *Plantago densa* Pilg.
- 6(221). *Plantago erecta* Morris<sup>56</sup>
- 7(222). *Plantago grandiflora* Meyen<sup>57</sup>
- 8(223). *Plantago helleri* Small
- 9(224). *Plantago hispidula* Ruiz & Pav.
- 10(225). *Plantago hookeriana* Decne.
- 11(226). *Plantago johnstonii* Pilg.
- 12(227). *Plantago lamprophylla* Pilg.
- 13(228). *Plantago limensis* Pers.<sup>58</sup>
- 14(229). *Plantago linearis* Kunth
- 15(230). *Plantago litorea* Phil.
- 16(231). *Plantago lundborgii* Sparre.
- 17(232). *Plantago nebularis* Hassemer
- 18(233). *Plantago nivea* Kunth
- 19(234). *Plantago patagonica* Jacq.<sup>59</sup>
- 20(235). *Plantago rancaguae* Steud.
- 21(236). *Plantago sericea* Ruiz & Pav.<sup>60</sup>
- 22(237). *Plantago tandilensis* Pilg.
- 23(238). *Plantago tolucensis* Pilg.
- 24(239). *Plantago wrightiana* Decne.

---

<sup>53</sup>*Plantago evacina* Boiss.

<sup>54</sup>*Plantago lessingii* Fisch. & C.A. Mey.

<sup>55</sup>*Plantago fastigiata* Morris

<sup>56</sup>*Plantago speciosa* Morris

<sup>57</sup>*Plantago macrantha* Decne.

<sup>58</sup>*Plantago tacnensis* Pilg.

<sup>59</sup>*Plantago purshii* Roem. ex Schult.; *Plantago spinulosa* Decne.

<sup>60</sup>*Plantago alopecurus* Decne.; *Plantago argyrophylla* Decne.; *Plantago caricina* Decne.; *Plantago macbridei* Pilg., sed.m.; *Plantago nubigena* Kunth; *Plantago perreymondii* Barn.; *Plantago polyclada* Pilg.



25(240). *Plantago zoellneriana* Hassemer

**Subgenus *Psyllium*** (Mill.) Harms & Reiche

**Sectio *Arborescens*** Shipunov sect.nov.

- 1(241). *Plantago arborescens* Poir.<sup>61</sup>
- 2(242). *Plantago asperrima* Gand. ex Hervier<sup>62</sup>
- 3(243). *Plantago famarae* Svent
- 4(244). *Plantago mauritanica* Boiss. & Reut.
- 5(245). *Plantago sempervirens* Crantz<sup>63</sup>
- 6(246). *Plantago sinaica* Barnéoud<sup>64</sup>
- 7(247). *Plantago webbii* Barnéoud

**Sectio *Psyllium*** Juss.

- 1(248). *Plantago afra* L.<sup>65</sup>
- 2(249). *Plantago arenaria* Waldst. & Kit.<sup>66</sup>
- 3(250). *Plantago chamaepsyllium* Zohary
- 4(251). *Plantago euphratica* Barnéoud
- 5(252). *Plantago exigua* Murray<sup>67</sup>
- 6(253). *Plantago maris-mortui* Eig
- 7(254). *Plantago phaeostoma* Boiss. & Heldr.
- 8(255). *Plantago squarrosa* Murray<sup>68</sup>

---

<sup>61</sup>*Plantago costae* Menezes; *Plantago maderensis* Decne.

<sup>62</sup>*Plantago assoana* Senn.

<sup>63</sup>*Plantago suffruticosa* Lam.

<sup>64</sup>*Plantago arabica* Boiss.

<sup>65</sup>*Plantago cynops* L. 1753, non L. 1762, nom.ambig. *Plantago psyllium* L. 1762, non L. 1753, nom.ambig.; *Plantago squalida* Salisb.; *Plantago rugosa* Hochst. ex Steud.

<sup>66</sup>*Plantago indica* L. 1759, nom.prop.rej.; *Plantago psyllium* L. 1753, nom.ambig.; *Plantago scabra* Moench, nom.illeg.

<sup>67</sup>*Plantago pumila* L.f.

<sup>68</sup>*Plantago sarcophylla* Boiss. ex Decne.
