# Supplementary figures and images for: Molecular and Morphological Data Improve the Classification of Plantagineae (Lamiales)
Source: MDPI journal article supplement (doi:10.3390/plants10112299), 2021-10-26

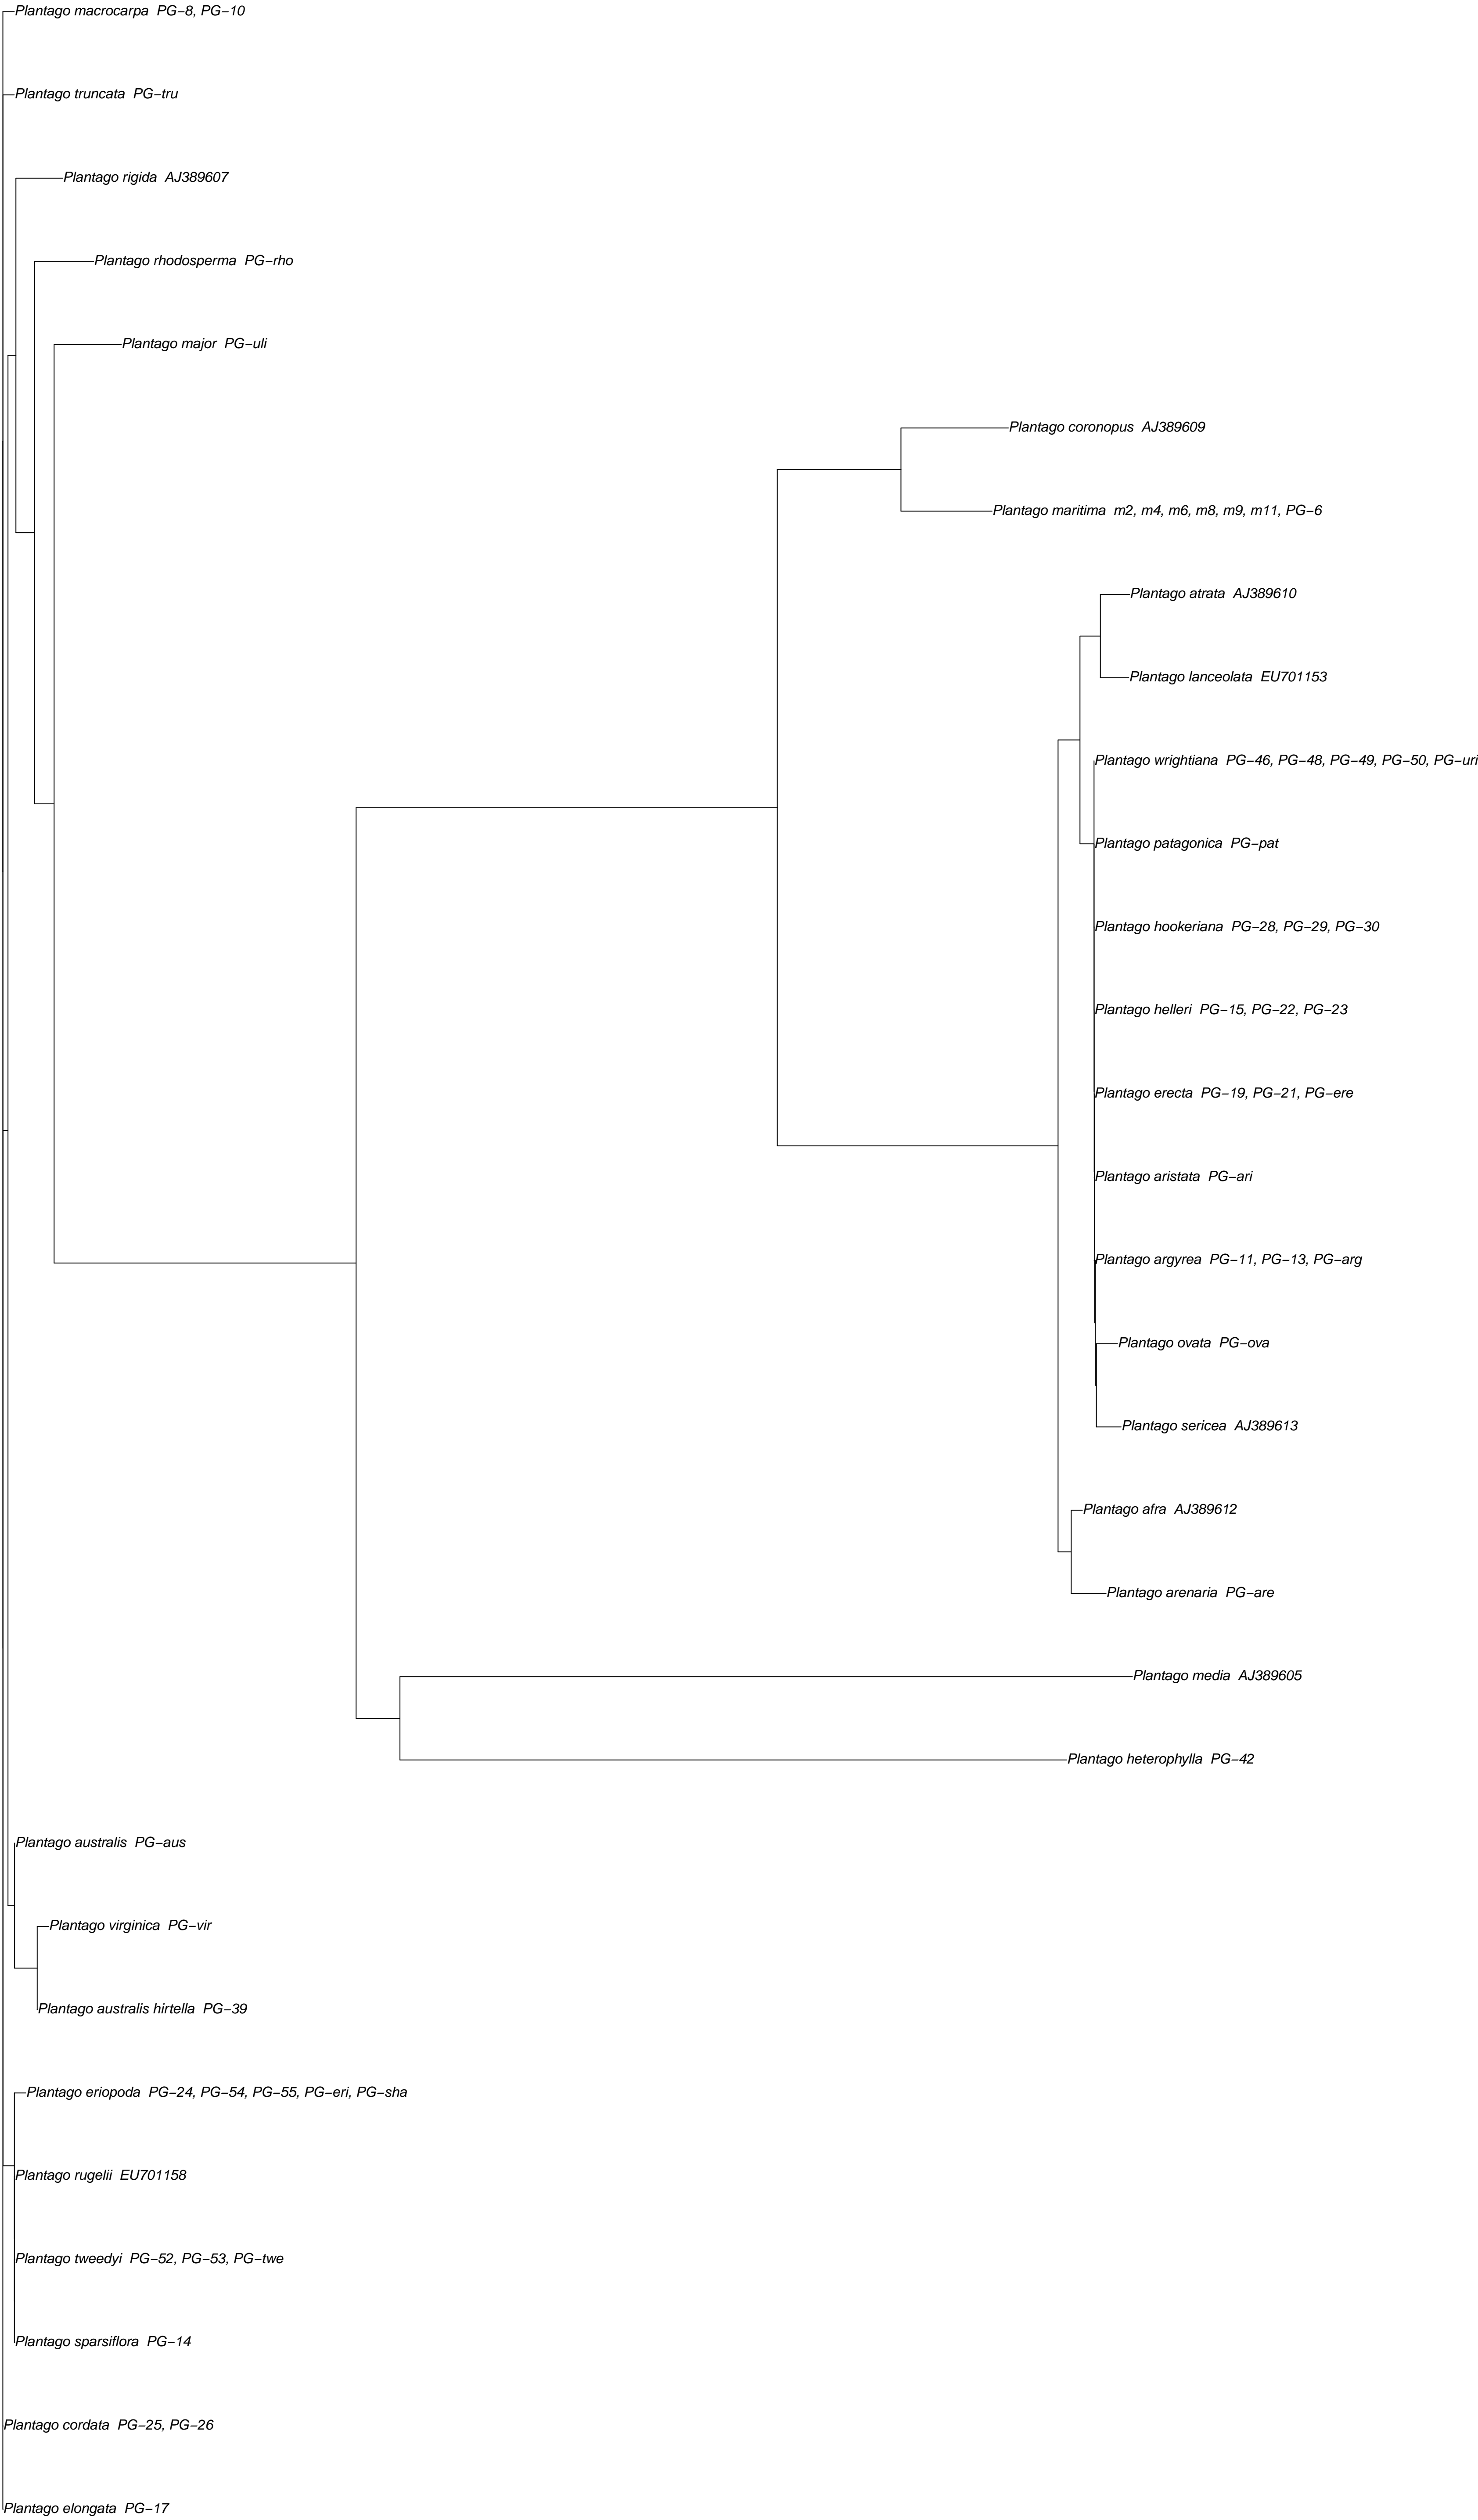

Supplement: s1 [file s1]
